# Supplementary material for: Transcriptomic analyses implicate neuronal plasticity and chloride homeostasis in ivermectin resistance and response to treatment in a parasitic nematode
Source: PubMed Central journal article supplement (PMC9232149; doi:10.1371/journal.ppat.1010545), 2022-06-13
Supplement: ppat.1010545.s001.pdf [file ppat.1010545.s001.pdf]

A

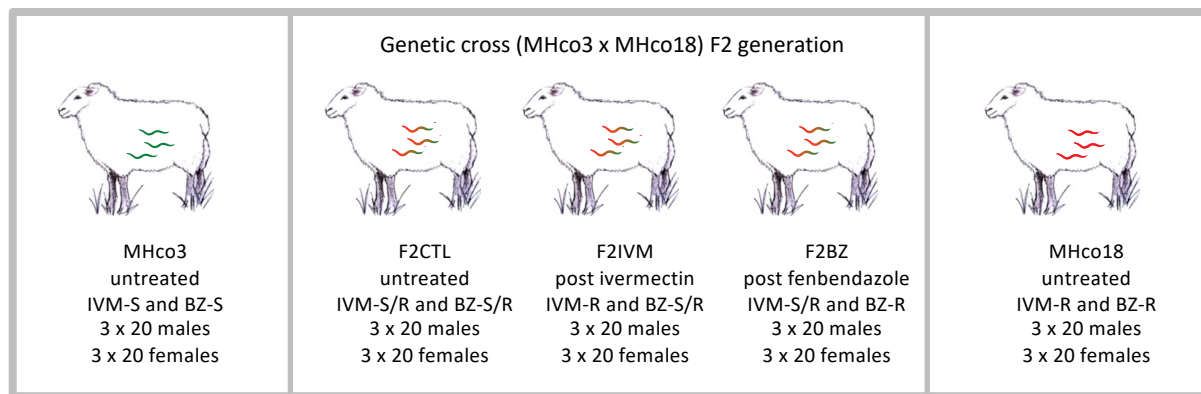

B

| Pairwise comparison<br>Analysis                                         | MHco18<br>v<br>MHco3<br>males | MHco18<br>v<br>MHco3<br>females | F2IVM<br>v<br>MHco3<br>males | F2IVM<br>v<br>MHco3<br>females | F2IVM<br>v<br>F2CTL<br>males | F2BZ<br>v<br>MHco3<br>males | F2BZ<br>v<br>MHco3<br>females | F2BZ<br>v<br>F2CTL<br>males | MHco4<br>v<br>MHco3<br>females | MHco10<br>v<br>MHco3<br>females |
|-------------------------------------------------------------------------|-------------------------------|---------------------------------|------------------------------|--------------------------------|------------------------------|-----------------------------|-------------------------------|-----------------------------|--------------------------------|---------------------------------|
| Transcriptomic differences associated with ivermectin resistance        | ✓                             | ✓                               | ✓                            | ✓                              | ✓                            | -                           | -                             | -                           | -                              | -                               |
| Differences in gene expression in ivermectin resistant male worms       | ✓                             | ✗                               | ✓                            | ✗                              | ✓                            | -                           | -                             | -                           | -                              | -                               |
| Differences in gene expression in ivermectin resistant female worms     | ✗                             | ✓                               | ✗                            | ✓                              | ✗                            | -                           | -                             | -                           | ✓                              | ✓                               |
| Transcriptomic response to ivermectin exposure                          | ✗                             | ✗                               | ✓                            | ✓                              | ✓                            | -                           | -                             | -                           | -                              | -                               |
| Similarities in gene expression with benzimidazole selected populations | ✓                             | ✓                               | ✓                            | ✓                              | ✓                            | ✓                           | ✓                             | ✓                           | -                              | -                               |
| Transcriptomic differences associated with benzimidazole resistance     | ✓                             | ✓                               | -                            | -                              | -                            | ✓                           | ✓                             | ✓                           | -                              | -                               |
