# Supplementary material for: Transcriptomic analyses implicate neuronal plasticity and chloride homeostasis in ivermectin resistance and response to treatment in a parasitic nematode
Source: PubMed Central journal article supplement (PMC9232149; doi:10.1371/journal.ppat.1010545), 2022-06-13
Supplement: ppat.1010545.s004.pdf [file ppat.1010545.s004.pdf]

A

Upregulated Genes

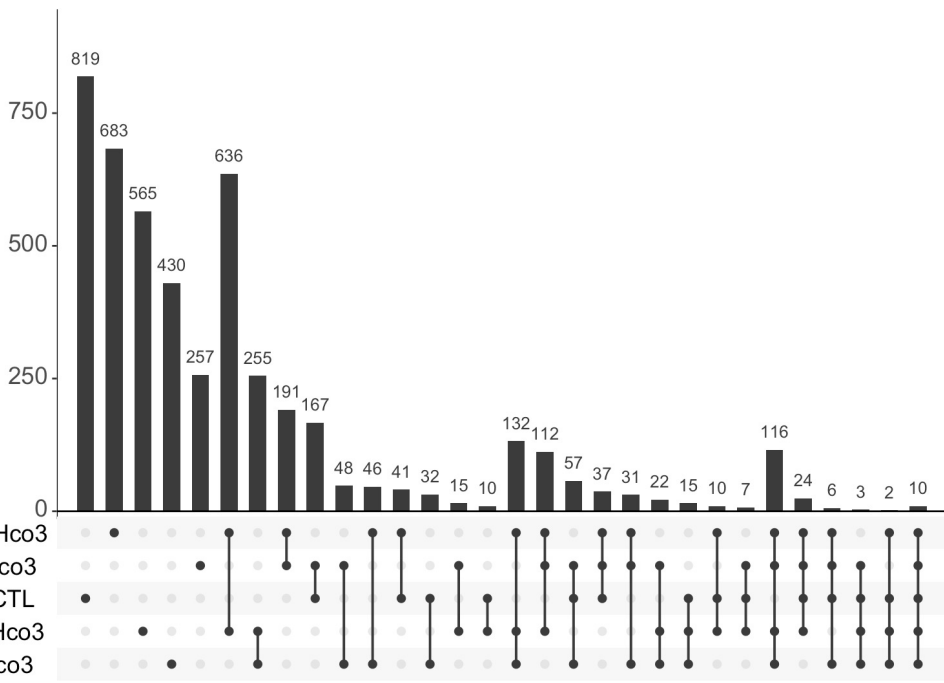

Downregulated Genes

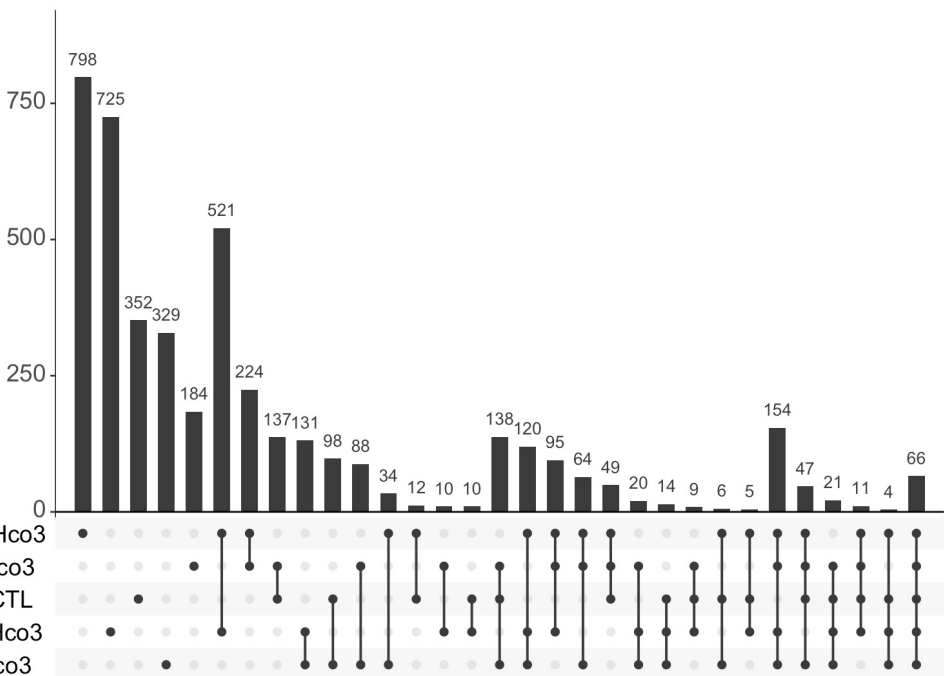

B

Set Size

Set Size
