# Supplementary material for: Transcriptomic analyses implicate neuronal plasticity and chloride homeostasis in ivermectin resistance and response to treatment in a parasitic nematode
Source: PubMed Central journal article supplement (PMC9232149; doi:10.1371/journal.ppat.1010545), 2022-06-13

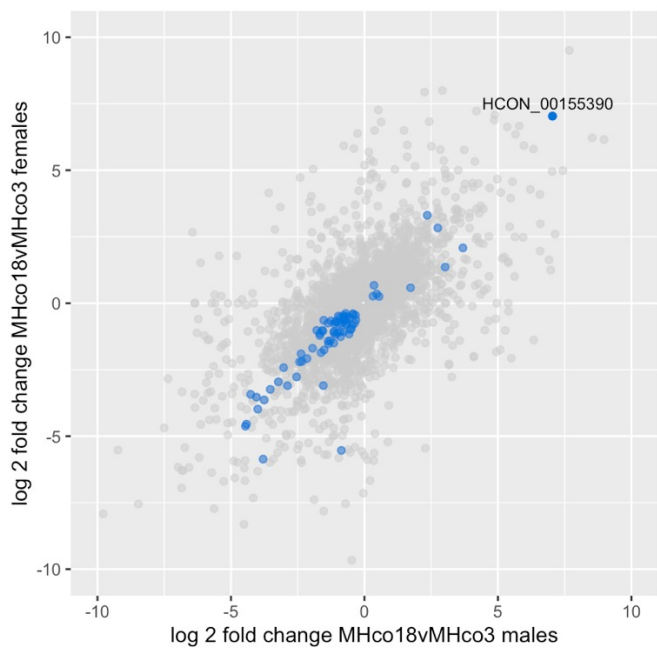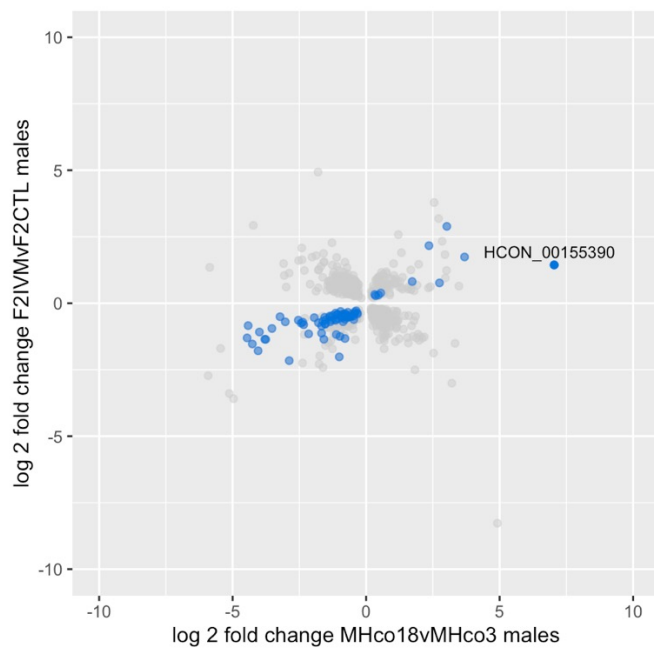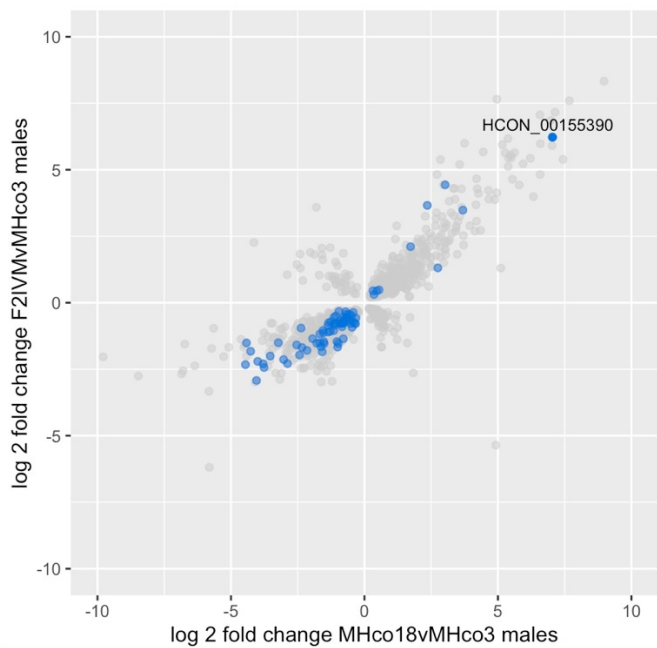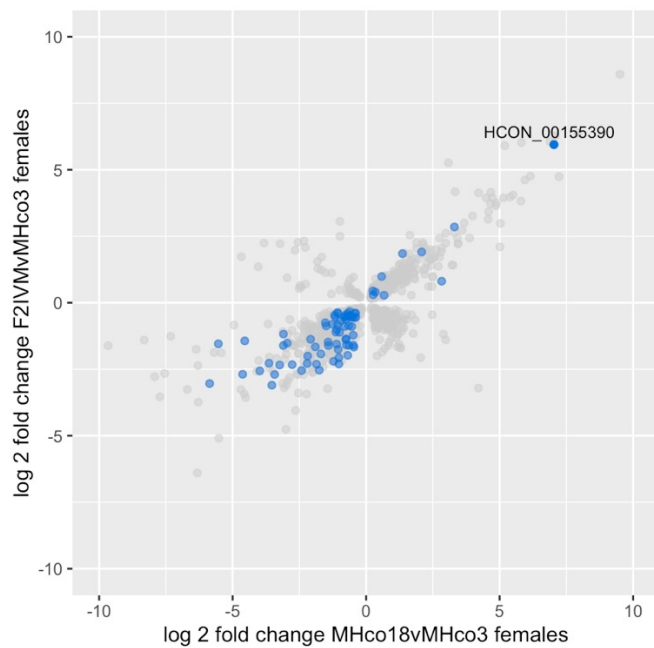

Supplement: ppat.1010545.s005.pdf [file ppat.1010545.s005.pdf]
