# Supplementary material for: Transcriptomic analyses implicate neuronal plasticity and chloride homeostasis in ivermectin resistance and response to treatment in a parasitic nematode
Source: PubMed Central journal article supplement (PMC9232149; doi:10.1371/journal.ppat.1010545), 2022-06-13

HCON\_00020000:avr-14

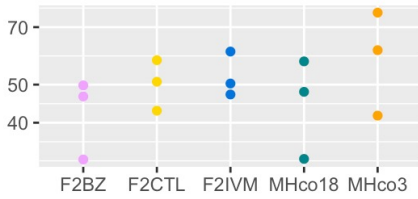

HCON\_00161180:avr-15

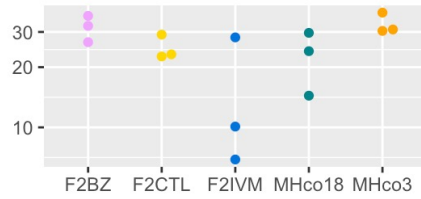

HCON\_00148840:glc-3

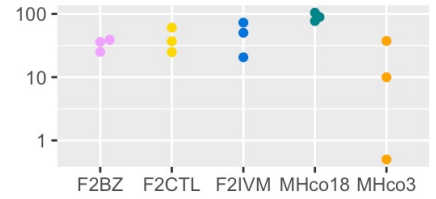

HCON\_00028600:glc-5

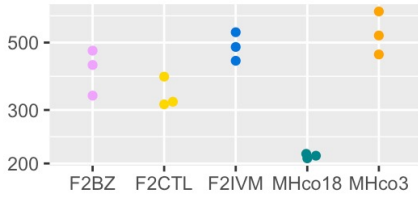

HCON\_00116640:glc-6

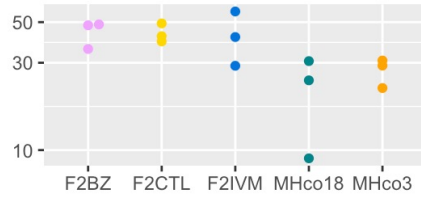

HCON\_00143950:cyp-33c3

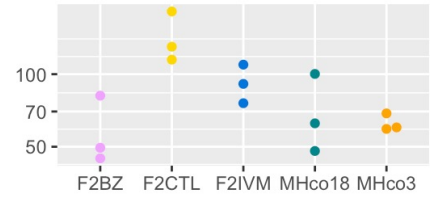

HCON\_00112510:nhr-8

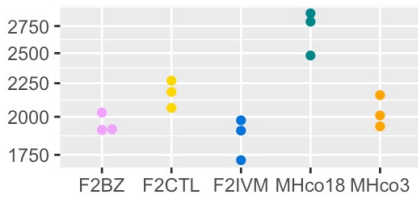

HCON\_00185950:dyf-7

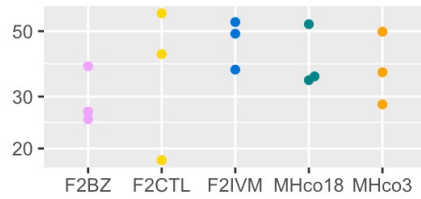

HCON\_00098130:pgp-1

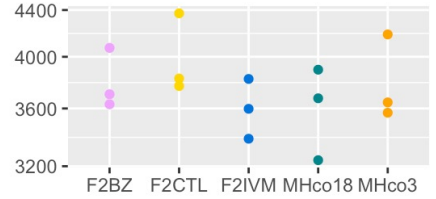

HCON\_00004450:pgp-2

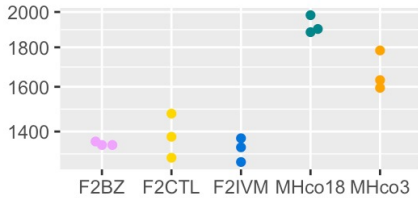

HCON\_00130050:pgp-9

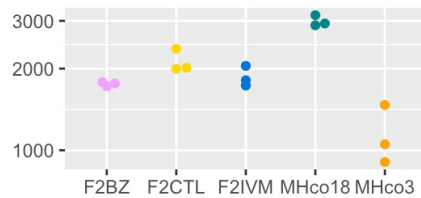

Supplement: ppat.1010545.s007.pdf [file ppat.1010545.s007.pdf]
